# Supplementary material for: Accelerating the discovery of biodiversity by detecting “new” species based on machine learning method
Source: Research Square preprint supplement (doi:10.21203/rs.3.rs-3832815/v1), 2024-01-09
Supplement: Supplementary file 1 [file af1c09a847f77f1b6a2c555f.docx]

**Supplementary information**

Table S1. Species and specimens used in the two datasets.

Video S1. Automatic rotating photo-taking equipment.

Fig. S1. An example of aligned image stack in dataset-2 (Carab-4).

Table S2. Comparison of model accuracies after 30 epochs in two datasets.

Fig. S2. AI barcodes of all specimens in dataset-2.

Text S1. DNA barcoding analysis of the *Melanopopillia* in dataset-1.

Table S3. Distances of the DNA barcodes.

Fig. S3. Neighbor-Joining tree of *Melanopopillia*, produced based on COⅠ barcoding fragment.

Text S2. Genus-level identification system in dataset-1.

Table S4. Specimens used in the genus-level identification system.

Fig. S4. Species images from the *Melanopopillia* genus-level identification system.

**Table S1. Species and specimens used in the two datasets.**

| Dataset | Family (Subfamily) | Genus | Species | Species code | Total specimens | CNN system | AI barcode | Control group | Type |
| --- | --- | --- | --- | --- | --- | --- | --- | --- | --- |
| 1 *Melanopopillia* | Scarabaeidae (Rutelinae) | *Melanopopillia* | *Melanopopillia dinghuensis* | M.ding | 15 | 10 | 5 | / | Known species |
| Scarabaeidae (Rutelinae) | *Melanopopillia* | *Melanopopillia hainanensis* | M.hain | 15 | 10 | 5 | / | Known species |
| Scarabaeidae (Rutelinae) | *Melanopopillia* | *Melanopopillia praefica* | M.prae | 20 | 10 | 5 | 5 | Known species (contrast) |
| Scarabaeidae (Rutelinae) | *Melanopopillia* | *Melanopopillia* sp. | M.sp.n | 5 | / | 5 | / | “New” species |
| 2 *Hong Kong beetles* | Carabidae (Cicindelinae) | *Cosmodela* | *Cosmodela aurulenta juxtata* | Carab-1 | 10 | 5 | 5 | / | Known species |
| Carabidae (Cicindelinae) | *Heptodonta* | *Heptodonta posticalis* | Carab-2 | 10 | 5 | 5 | / | Known species |
| Carabidae (Cicindelinae) | *Probstia* | *Probstia astoni* | Carab-3 | 15 | 5 | 5 | 5 | Known species (contrast) |
| Carabidae (Carabinae) | *Orthogonius* | *Orthogonius xanthomerus* | Carab-4 | 15 | 5 | 5 | 5 | Known species (contrast) |
| Staphylinidae | *Naddia* | *Naddia* sp. | Staph-1 | 8 | 4 | 4 | / | Known species |
| Scarabaeidae (Aphodiinae) | *Teuchestes* | *Teuchestes* sp. | Scara-1 | 9 | 4 | 5 | / | Known species |
| Scarabaeidae (Melolonthinae) | *Sophrops* | *Sophrops* sp. 1 | Scara-2 | 10 | 5 | 5 | / | Known species |
| Scarabaeidae (Rutelinae) | *Anomala* | *Anomala russiventris* | Scara-3 | 14 | 5 | 5 | 4 | Known species (contrast) |
| Scarabaeidae (Cetoniinae) | *Euselates* | *Euselates magna* | Scara-4 | 10 | 5 | 5 | / | Known species |
| Elateridae | *Campsosternus* | *Campsosternus auratus* | Elate-1 | 10 | 5 | 5 | / | Known species |
| Elateridae | *Ludioschema* | *Ludioschema* sp. | Elate-2 | 10 | 5 | 5 | / | Known species |
| Elateridae | *Melanotus* | *Melanotus* sp. | Elate-3 | 10 | 5 | 5 | / | Known species |
| Prionoceridae | *Idgia* | *Idgia oculata* | Prion-1 | 10 | 5 | 5 | / | Known species |
| Tenebrionidae (Stenochinae) | *Strongylium* | *Strongylium* sp. | Teneb-1 | 15 | 5 | 5 | 5 | Known species (contrast) |
| Mordellidae (Mordellinae) | *Glipa* | *Glipa nipponica* | Morde-1 | 10 | 5 | 5 | / | Known species |
| Cerambycidae | *Falsomesosella* | *Falsomesosella grisella* | Ceram-1 | 10 | 5 | 5 | / | Known species |
| Cerambycidae | *Priotyrannus* | *Priotyrannus closteroides* | Ceram-2 | 10 | 5 | 5 | / | Known species |
| Hydrophilidae | *Sternolophus* | *Sternolophus rufipes* | Hydro-1 | 5 | / | 5 | / | “New” record species |
| Hybosoridae | *Phaeochrous* | *Phaeochrous* sp. | Hybos-1 | 5 | / | 5 | / | “New” record species |
| Scarabaeidae (Melolonthinae) | *Sophrops* | *Sophrops* sp. 2 | Scara-5 | 5 | / | 5 | / | “New” record species |
| Scarabaeidae (Rutelinae) | *Mimela* | *Mimela chinensis* | Scara-6 | 5 | / | 5 | / | “New” record species |


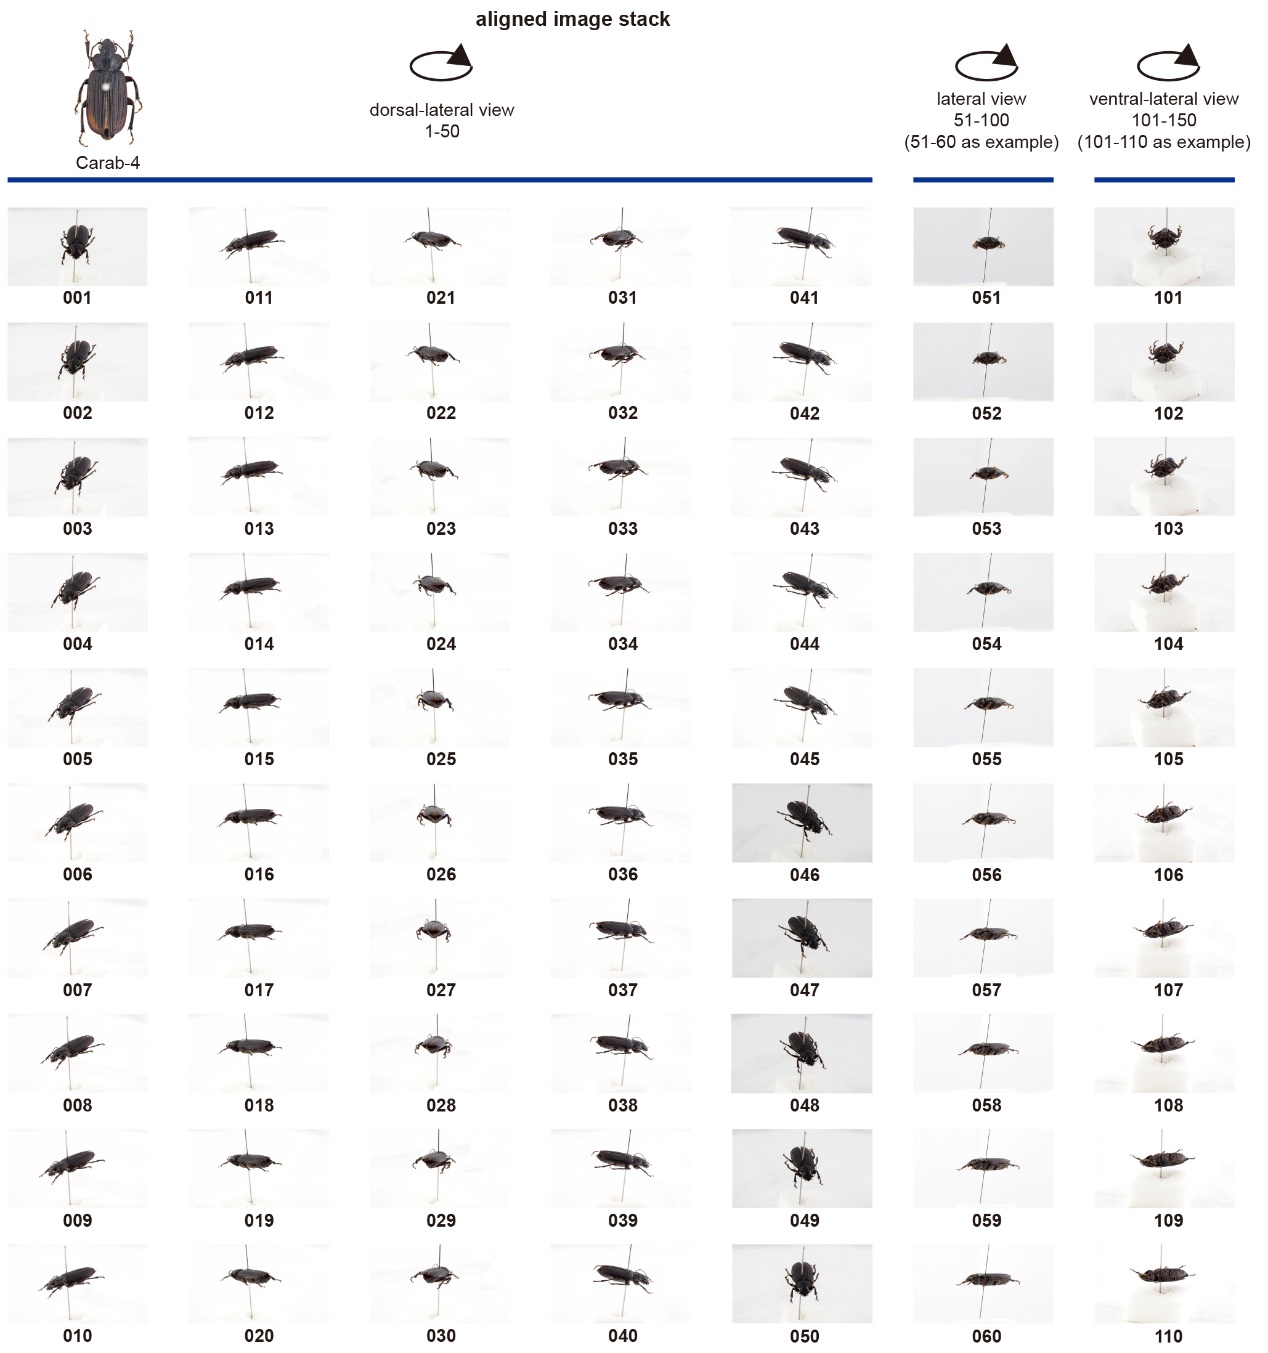


**Fig. S1. An example of aligned image stack in dataset-2 (Carab-4).**

**Table S2 Comparison of model accuracies after 30 epochs in two datasets.**

| Model | Dataset 1 | | Dataset 2 | |
| --- | --- | --- | --- | --- |
| Accuracy | Train Time | Accuracy | Train Time |
| AlexNet | 0.8882 | 207m28s | 0.8712 | 291m27s |
| ResNet-152 | 0.9749 | 640m8s | 0.9565 | 1015m11s |
| DenseNet | 0.9776 | 391m34s | 0.9622 | 292m51s |
| MobileNet V2 | 0.9745 | 316m57s | 0.9558 | 351m10s |


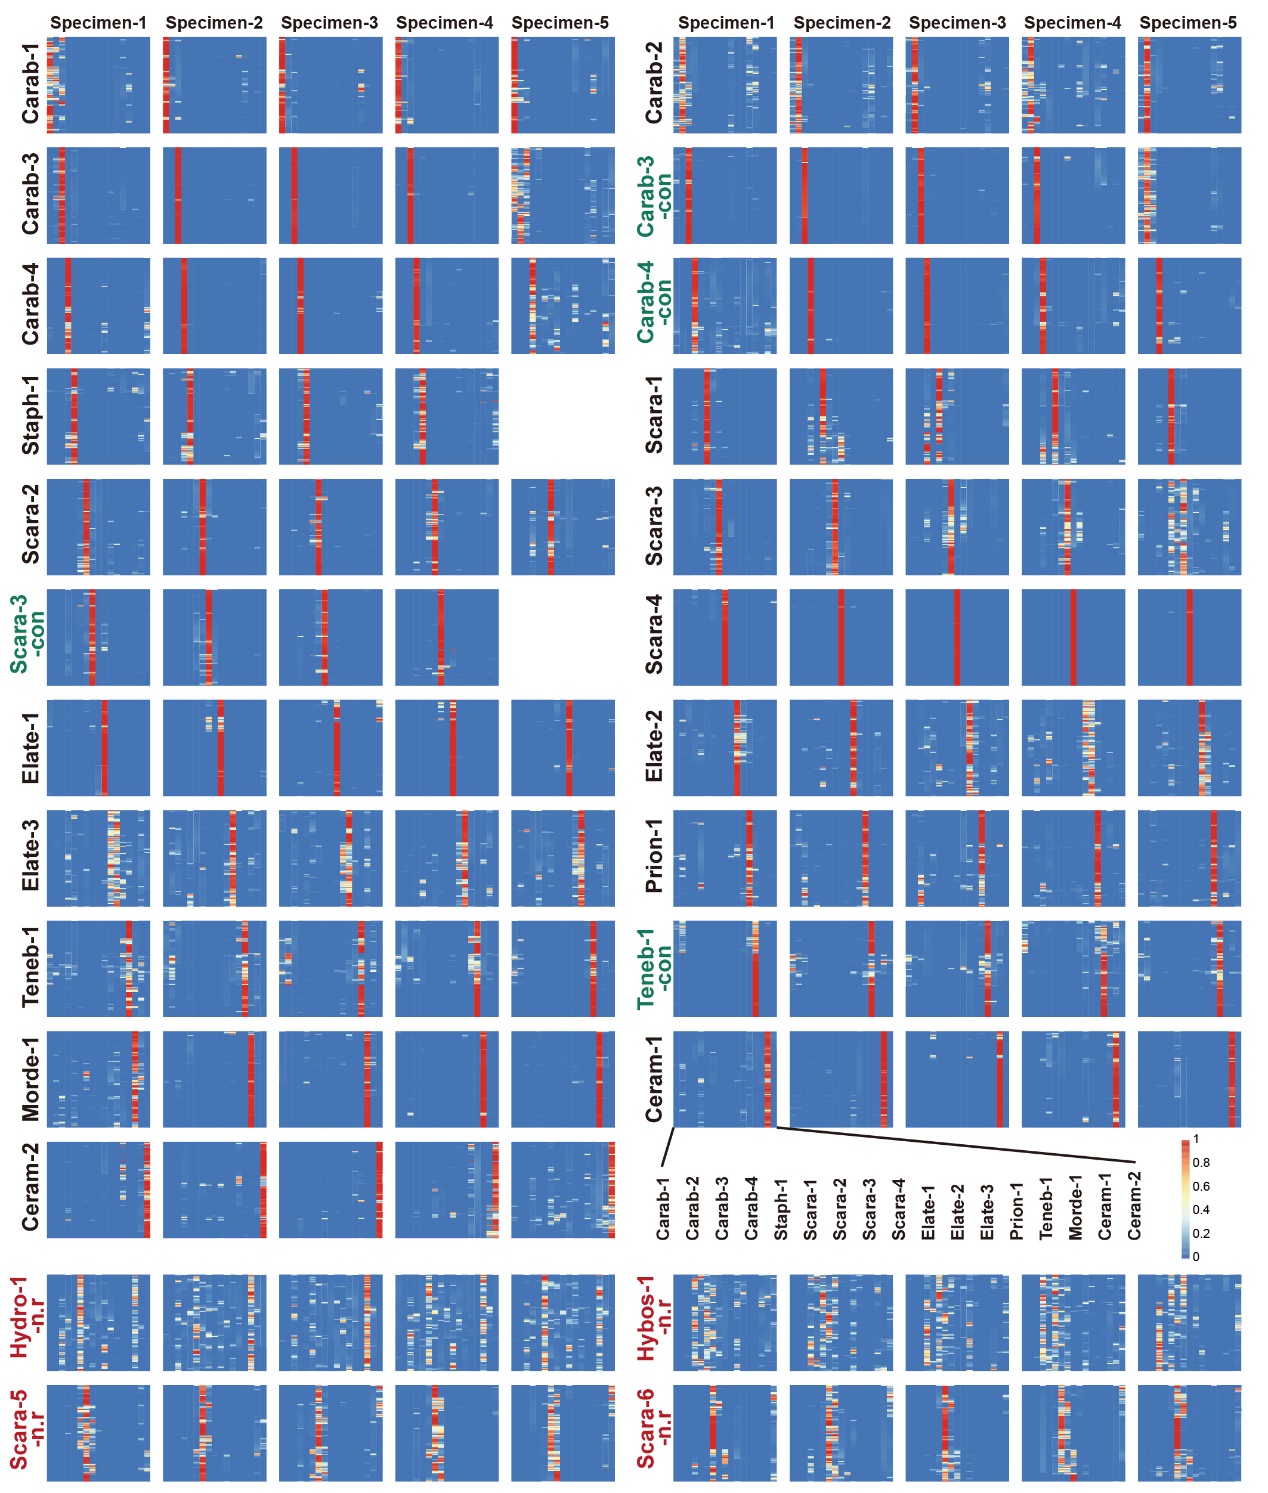


**Fig. S2. AI barcodes of all specimens in dataset-2.** Carab-1 (specimen 1–5), Carab-2 (specimen 1–5), Carab-3 (specimen 1–5), Carab-3-con (specimen 1–5), Carab-4 (specimen 1–5), Carab-1-con (specimen 1–5), Staph-1 (specimen 1–4), Scara-1 (specimen 1–5), Scara-2 (specimen 1–5), Scara-3 (specimen 1–5), Scara-3-con (specimen 1–4), Scara-4 (specimen 1–5), Elate-1 (specimen 1–5), Elate-2 (specimen 1–5), Elate-3 (specimen 1–5), Prion-1, Teneb-1 (specimen 1–5), Teneb-1-con (specimen 1–5), Morde-1 (specimen 1–5), Ceram-1 (specimen 1–5), Ceram-2 (specimen 1–5), Hydro-1-n.r (specimen 1–5), Hybos-1-n.r (specimen 1–5), Scara-5-n.r (specimen 1–5), and Scara-6-n.r (specimen 1–5).

**Text S1. DNA barcoding analysis of the *Melanopopillia* in dataset-1.**

In this study, specimens of the described species in *Melanopopillia* used for extraction of DNA. Blood/cell/Tissue genomic DNA extraction Kit (Beijing Tiangen Biochemical Technology Co., LTD.) and DNeasy Blood & Tissue Kit (Shenzhen Kaijie Biological Engineering Co., LTD.) were used to complete the extraction of total DNA from specimens. Use primer LCO1490 (5'-GGTCAACAAATCATAAAGATATTGG-3') and HCO2198 (5'-TAAACTTCAGGGTGACCAAAAAATCA-3'). Amplification experiments were performed according to experimental experience, and the quality of DNA extracted from specimens was adjusted appropriately. 25 μL PCR system: Mastermix 12.5 μL, primers LCO1490 and HCO2198 1 μl (10 μmol/L), template DNA 2μL, ddH2O 8.5μL.

PCR reaction conditions were as follows: predenaturation at 94℃ for 1min; The 39 cycles included denaturation at 94℃ for 30 s, renaturation at 50℃ for 30 s, and extension at 65℃ for 10 s. Finally, it was extended at 65℃ for 10 min. The amplified specimens were stored in a refrigerator at 4℃, and 2 μL of the amplified products were separated by electrophoresis on 1% agarose gels using DNA 2000 Marker as the standard. The electrophoresis apparatus voltage was 100 V, the time was 40 min, and the gel imaging system was used to check the amplification results. The amplification products of the targeted bands were sent to Beijing Qingke Xinye Biotechnology Co., Ltd. for bidirectional sequencing, and the results were analyzed by Geneious Prime 2020.2.4.

Out of the five specimens used, COI barcoding fragment was successfully amplified and sequenced. All sequenced specimens have provided high quality molecular data and almost identical sequences, which increased their reliability. The sequences of M.sp.n were unambiguously related with M.hain and M.ding specimens (Fig. S3), but the genetic distance among these three species (4%) and even greater distance from M.hain (4.3-4.4%) support the hypothesis that M.sp.n should be considered a separate species (Table S3).

**Table S3. Distances of the DNA barcodes.**

|  | M.prae-1 | M.prae-2 | M.ding | M.hain-1 | M.hain-2 |
| --- | --- | --- | --- | --- | --- |
| M.prae-2 | 0.004587188 |  |  |  |  |
| M.ding | 0.103173279 | 0.1067768986 |  |  |  |
| M.hain-1 | 0.0996624242 | 0.1032466690 | 0.0281341586 |  |  |
| M.hain-2 | 0.1014513349 | 0.1014513349 | 0.0281341586 | 0.0015243914 |  |
| M.sp.n | 0.1104931726 | 0.1141561927 | 0.0394061247 | 0.0427545025 | 0.0444101332 |


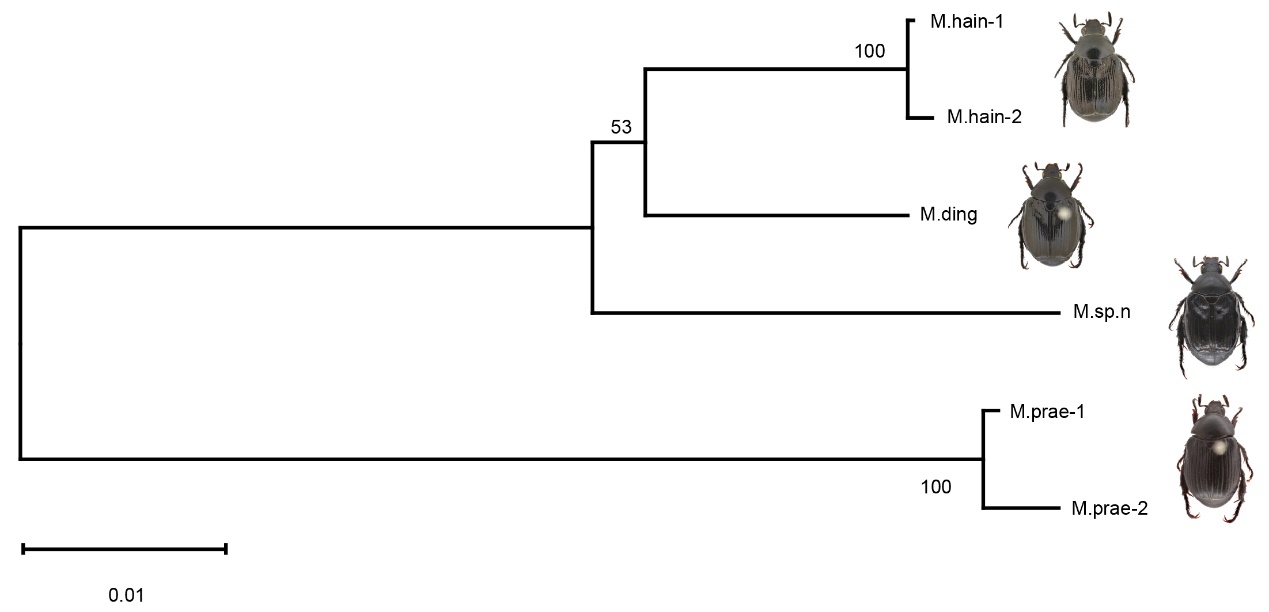


**Fig. S3. Neighbor-Joining tree of Melanopopillia, produced based on COⅠ barcoding fragment.**

**Text S2. Genus-level identification system in dataset-1.**

Except for *Melanopopillia*, four other genera (*Anomala*, *Callistethus*, *Mimela,* and *Popillia*) which are morphologically similar and phylogenetically related were used for the genus-level identification of new species and higher-level taxa identification. The genera *Anomala*, *Callistethus*, *Mimela,* and *Popillia* were represented by two species, and *Melanopopillia* by all three assigned species. The total number of images obtain is as follows: (527 images* 3 views+500 images* 2 views) *(5 specimens/species *2 species/genus *4 genera +4 specimens/species *3 species) = 2581 images/specimen* 52 specimens = 134212 images. The images were processed by random shearing, changing brightness and changing size. After sufficiently shuffling the order, the dataset was randomly divided into a training set, validation set, and test set in an 8:1:1 ratio from the full image set. We used the Inception-v3 network to develop the CNN model for differentiating the genera. The genus-level identification system’s top-1 accuracy was 98.4%. The 66 random images of M.sp.n were put into the identification system and obtained the top-1 score of 93% (Fig. S4, Table S4).

**Table S4. Specimens used in the genus-level identification system.**

| Family (Subfamily) | Genus | Species | Species code | Specimens |
| --- | --- | --- | --- | --- |
| Scarabaeidae (Rutelinae) | *Melanopopillia* | *Melanopopillia dinghuensis* | M.ding | 4 |
| Scarabaeidae (Rutelinae) | *Melanopopillia* | *Melanopopillia hainanensis* | M.hain | 4 |
| Scarabaeidae (Rutelinae) | *Melanopopillia* | *Melanopopillia praefica* | M.prae | 4 |
| Scarabaeidae (Rutelinae) | *Anomala* | *Anomala aulax* | An.au | 5 |
| Scarabaeidae (Rutelinae) | *Anomala* | *Anomala corpulenta* | An.co | 5 |
| Scarabaeidae (Rutelinae) | *Callistethus* | *Callistethus auronitens* | Ca.au | 5 |
| Scarabaeidae (Rutelinae) | *Callistethus* | *Callistethus plagiicollis plagiicollis* | Ca.pl | 5 |
| Scarabaeidae (Rutelinae) | *Mimela* | *Mimela chinensis* | Mi.ch | 5 |
| Scarabaeidae (Rutelinae) | *Mimela* | *Mimela holosericea* | Mi.ho | 5 |
| Scarabaeidae (Rutelinae) | *Popillia* | *Popillia fukiensis* | Po.fu | 5 |
| Scarabaeidae (Rutelinae) | *Popillia* | *Popillia histeroidea* | Po.hi | 5 |


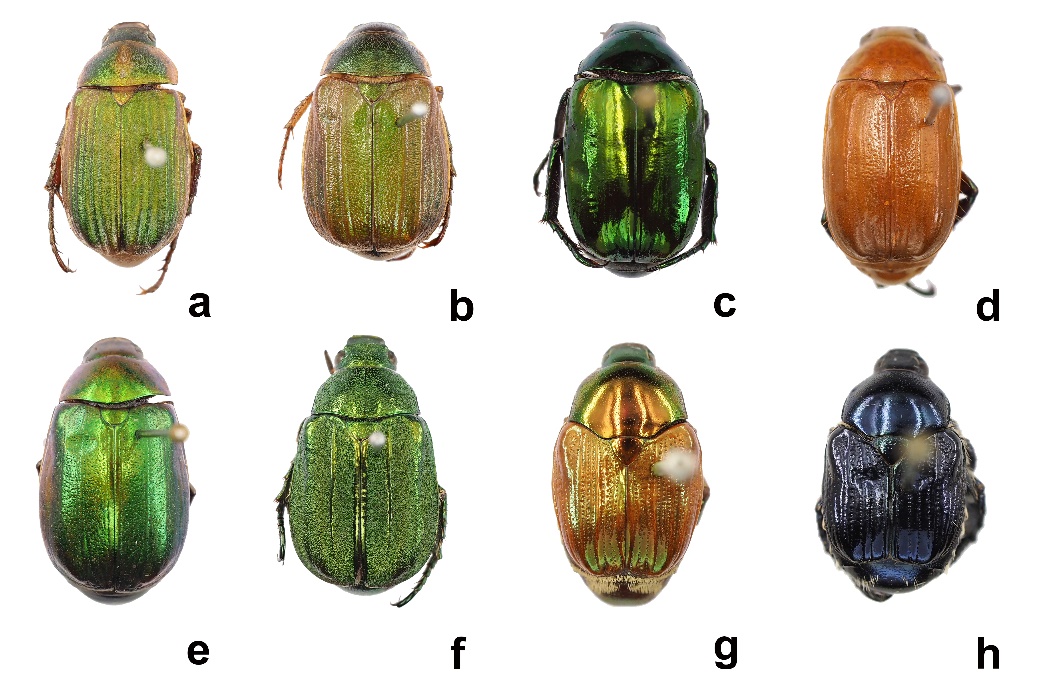
**Fig. S4. Species images from the *Melanopopillia* genus-level identification system**. a) *Anomala aulax*, b) *Anomala corpulenta*, c) *Callistethus auronitens*, d) *Callistethus plagiicollis plagiicollis*, e) *Mimela chinensis*, f) *Mimela holosericea*, g) *Popillia fukiensis*, h) *Popillia histeroidea*.
